# Supplementary material for: The SOS response increases bacterial fitness, but not evolvability, under a sublethal dose of antibiotic
Source: PubMed Central journal article supplement (PMC4614765; doi:10.1098/rspb.2015.0885), 2015-10-07
Supplement: rspb20150885supp2.pdf [file rspb20150885supp2.pdf]

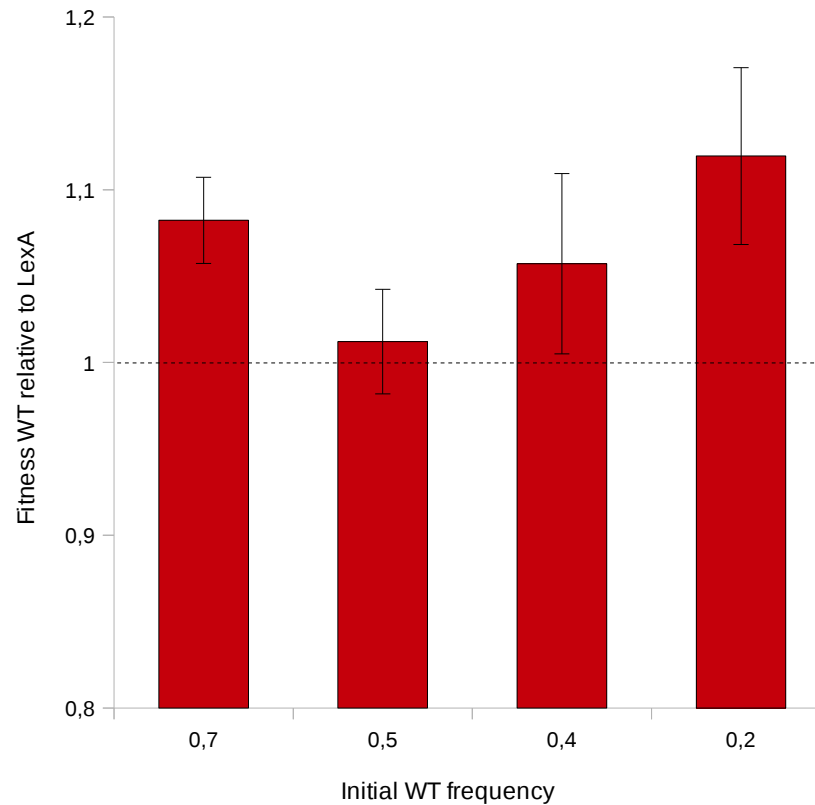

**Supplementary Figure 1.** Short-term fitness effects of the SOS response. Competitive fitness of the WT strain relative to the LexA mutant, as measured using overnight competition experiments in the presence of 48  $\mu\text{g/L}$  of ciprofloxacin. Values are the average of 5 independent replicates starting from different WT:LexA frequencies and error bars are SEM. The dashed line represents no relative fitness difference (value of 1).

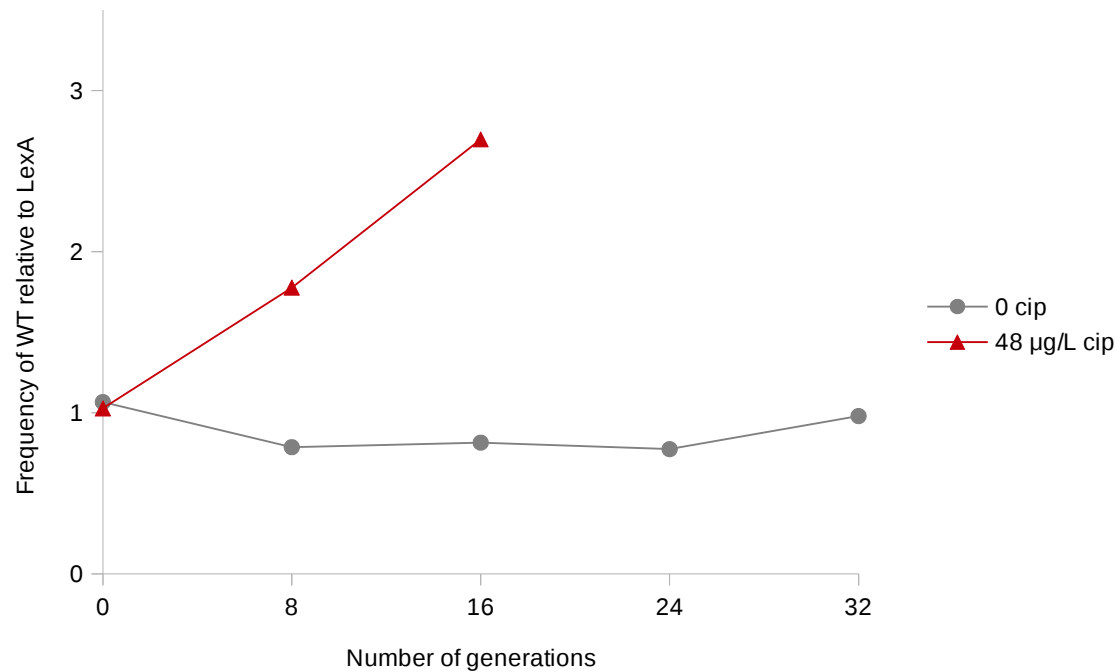

**Supplementary Figure 2. Short-term fitness effects of the SOS response.** Panel B shows the frequency of the WT strain in competition with the LexA mutant across multiple cycles of competition, such that each day corresponds to 8 generations. After 16 generations, the WT strain had achieved such a high frequency that it could no longer be accurately measured. Values are the mean of six independent replicates and error bars correspond to SEM.

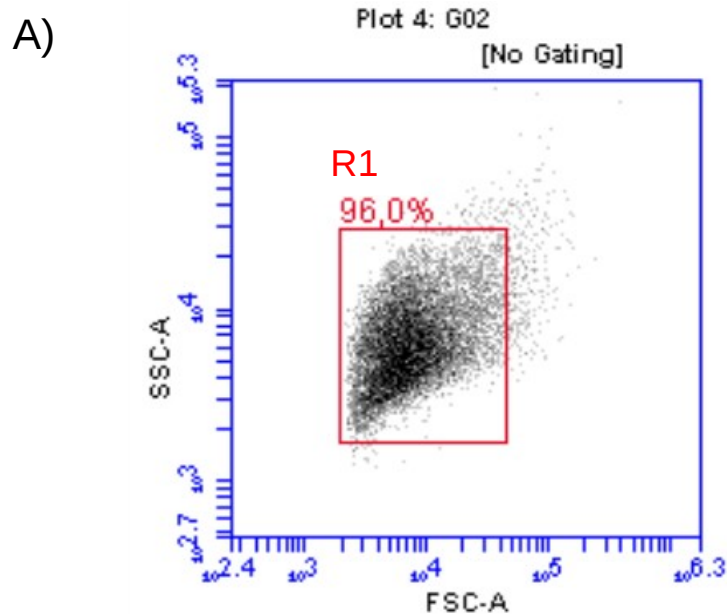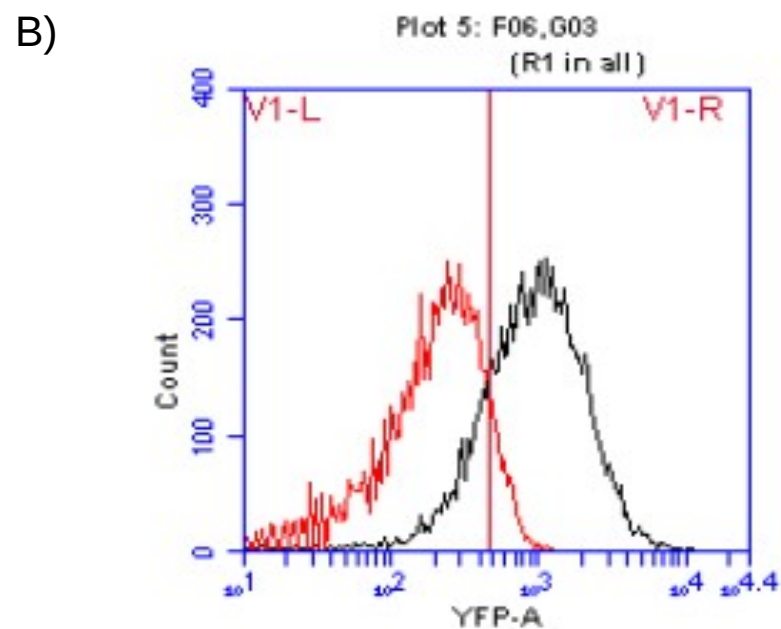

**Supplementary Figure 3.** Example of fitness gating in flow cytometry. Examples of FSC-SSC gating (Panel A), and pure culture spil-over of WT and WT-YFP strains (Panel B) showing the percentages of tagged (V1-R) and untagged (V1-L) overlapping used in the correction formula (Table Panel C). In this case: 18.26% of the tagged pure culture spil-over the non YFP fluorescence range (V1-L) and 9.11% of the untagged strain spil-over in the YFP range (V1-R).

C)

| <input checked="" type="checkbox"/> Plot 5: Multiple Samples | Count | Volume ( $\mu$ L) | % of This Plot |
|--------------------------------------------------------------|-------|-------------------|----------------|
| Gated on (R1 in all)                                         |       |                   |                |
| F06 : V1-L (1,0 / 462,0)                                     | 1.741 | 21,5              | 18,26%         |
| F06 : V1-R (462,0 / 16.777...                                | 7.793 | 21,5              | 81,74%         |
| F06 : This Plot                                              | 9.534 | 21,5              | 100,00%        |
| G03 : V1-L (1,0 / 462,0)                                     | 8.808 | 16,9              | 90,89%         |
| G03 : V1-R (462,0 / 16.777...                                | 883   | 16,9              | 9,11%          |
| G03 : This Plot                                              | 9.691 | 16,9              | 100,00%        |
